# Supplementary figures and images for: Increasing prevalence and high incidence of celiac disease in elderly people: A population-based study
Source: Springer Nature journal article supplement (doi:10.1186/1471-230x-9-49), 2009-06-29

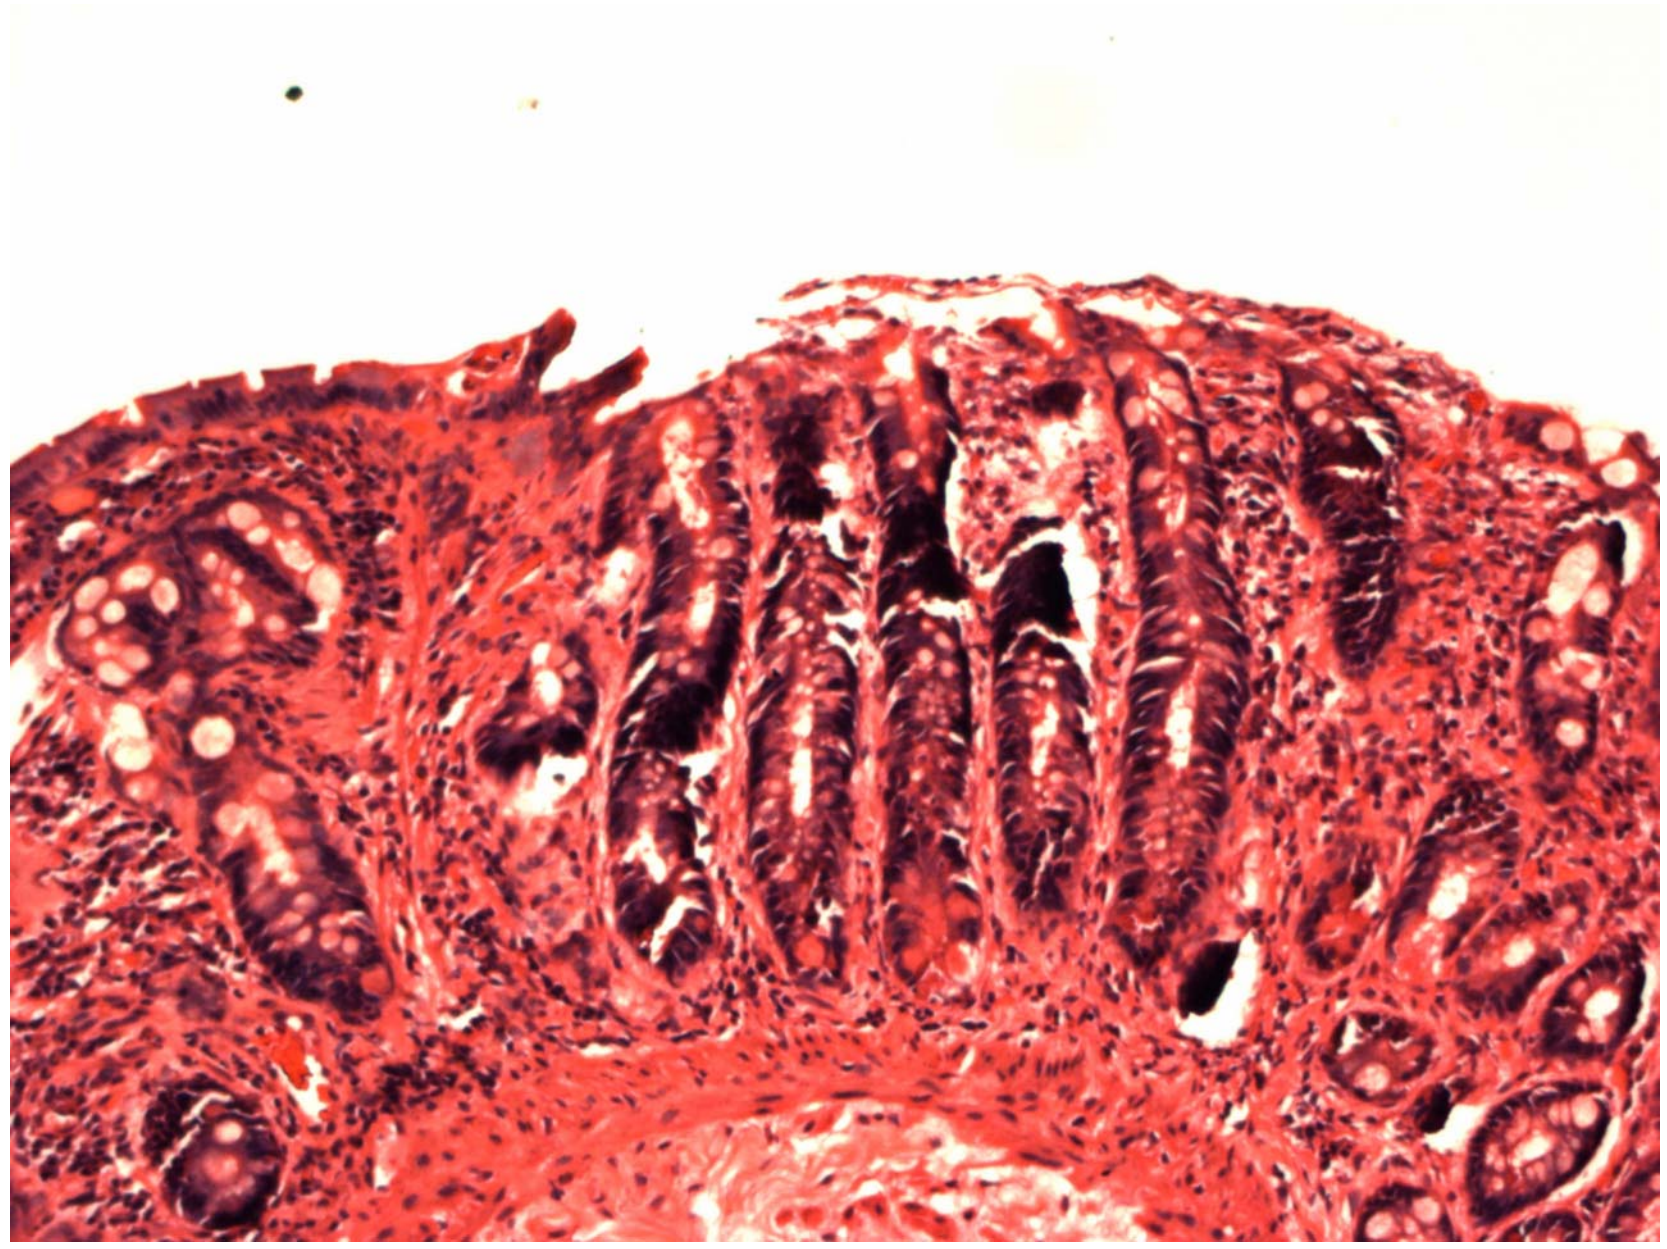

Supplement: 12876_2009_341_MOESM1_ESM.pdf [file 12876_2009_341_MOESM1_ESM.pdf]

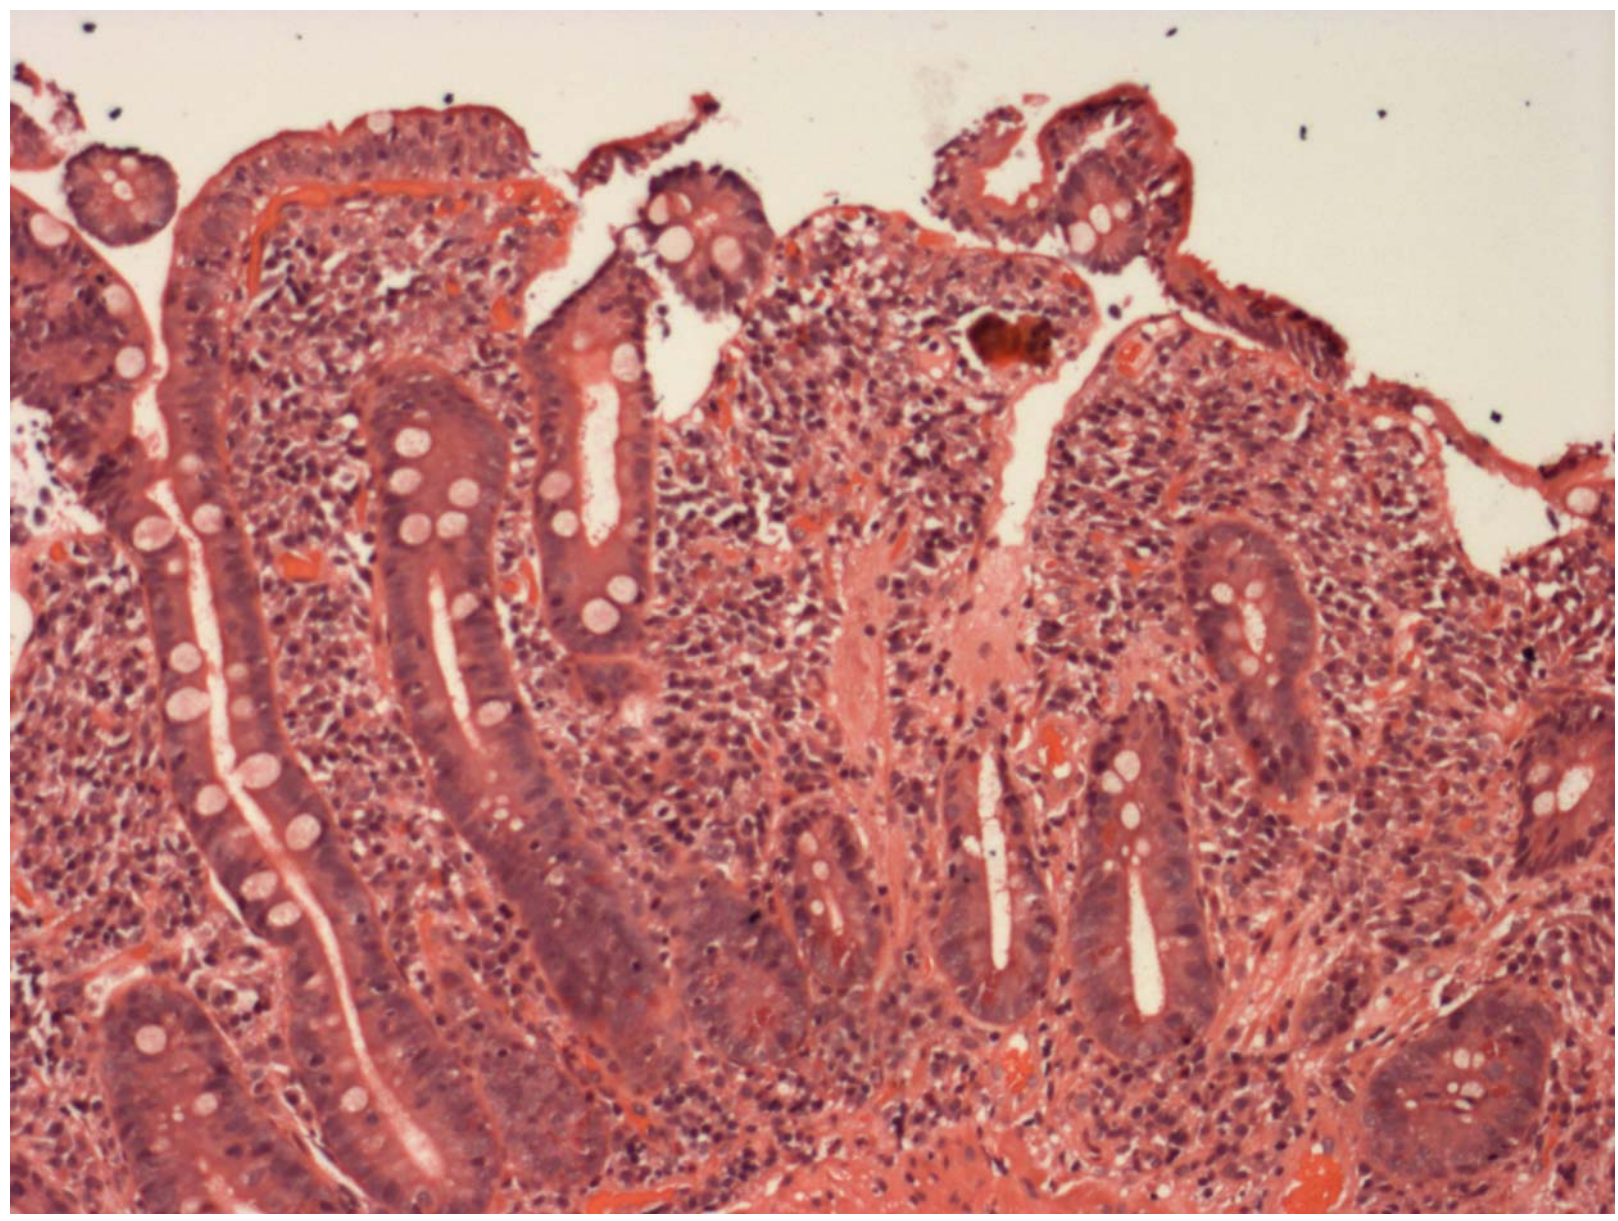

Supplement: 12876_2009_341_MOESM2_ESM.pdf [file 12876_2009_341_MOESM2_ESM.pdf]
